# Supplementary material for: Metagenomics-Based Analysis of the Age-Related Cumulative Effect of Antibiotic Resistance Genes in Gut Microbiota
Source: MDPI journal article supplement (doi:10.3390/antibiotics10081006), 2021-08-20
Supplement: s1 [file s1]

Supplementary Table S1 Categories of drugs and resistance mechanisms.

| ARO name            | Drug Class                                                                   | Resistance Mechanism          | AMR Gene Family                                                |
|---------------------|------------------------------------------------------------------------------|-------------------------------|----------------------------------------------------------------|
| aph3-Ib             | aminoglycoside antibiotic                                                    | antibiotic inactivation       | aph3                                                           |
| sul2                | sulfonamide antibiotic;<br>sulfone antibiotic                                | antibiotic target replacement | sulfonamide resistant sul                                      |
| ermB                | macrolide antibiotic;<br>lincosamide antibiotic;<br>streptogramin antibiotic | antibiotic target alteration  | erm 23S ribosomal RNA methyltransferase                        |
| tetQ                | tetracycline antibiotic                                                      | antibiotic target protection  | tetracycline-resistant ribosomal protection protein            |
| ermG                | macrolide antibiotic;<br>lincosamide antibiotic;<br>streptogramin antibiotic | antibiotic target alteration  | erm 23S ribosomal RNA methyltransferase                        |
| ermF                | macrolide antibiotic;<br>lincosamide antibiotic;<br>streptogramin antibiotic | antibiotic target alteration  | erm 23S ribosomal RNA methyltransferase                        |
| cfxA3               | cephamycin                                                                   | antibiotic inactivation       | cfxA beta-lactamase                                            |
| adeF                | fluoroquinolone antibiotic;<br>tetracycline antibiotic                       | antibiotic efflux             | resistance-nodulation-cell division RND antibiotic efflux pump |
| cfxA6               | cephamycin                                                                   | antibiotic inactivation       | cfxA beta-lactamase                                            |
| oxa-85              | cephalosporin; penam                                                         | antibiotic inactivation       | oxa beta-lactamase                                             |
| ermX                | macrolide antibiotic;<br>lincosamide antibiotic;<br>streptogramin antibiotic | antibiotic target alteration  | erm 23S ribosomal RNA methyltransferase                        |
| tem-1               | monobactam; cephalosporin;<br>penam; penem                                   | antibiotic inactivation       | tem beta-lactamase                                             |
| tetW                | tetracycline antibiotic                                                      | antibiotic target protection  | tetracycline-resistant ribosomal protection protein            |
| aac6-Ie-<br>aph2-Ia | aminoglycoside antibiotic                                                    | antibiotic inactivation       | aph2; aac6                                                     |
| tetW/N/<br>W        | tetracycline antibiotic                                                      | antibiotic target protection  | tetracycline-resistant ribosomal protection protein            |
| efrB                | macrolide antibiotic;<br>fluoroquinolone antibiotic;<br>rifamycin antibiotic | antibiotic efflux             | ATP-binding cassette ABC antibiotic efflux pump                |
| dfrF                | diaminopyrimidine antibiotic                                                 | antibiotic target replacement | trimethoprim resistant dihydrofolate reductase dfr             |

|                              |                                                                                                                                                               |                                                                                           |                                                                                                                                                                                                                                                 |
|------------------------------|---------------------------------------------------------------------------------------------------------------------------------------------------------------|-------------------------------------------------------------------------------------------|-------------------------------------------------------------------------------------------------------------------------------------------------------------------------------------------------------------------------------------------------|
| mdtO                         | nucleoside antibiotic;<br>acridine dye                                                                                                                        | antibiotic efflux                                                                         | major facilitator superfamily MFS antibiotic efflux pump                                                                                                                                                                                        |
| tetX                         | glycylcycline; tetracycline antibiotic                                                                                                                        | antibiotic inactivation                                                                   | tetracycline inactivation enzyme                                                                                                                                                                                                                |
| mdtP                         | nucleoside antibiotic;<br>acridine dye                                                                                                                        | antibiotic efflux                                                                         | major facilitator superfamily MFS antibiotic efflux pump                                                                                                                                                                                        |
| escheric<br>hia coli<br>soxR | fluoroquinolone antibiotic;<br>cephalosporin; glycylcycline;<br>penam; tetracycline<br>antibiotic; rifamycin<br>antibiotic; phenicol<br>antibiotic; triclosan | antibiotic target alteration;<br>antibiotic efflux                                        | ATP-binding cassette ABC antibiotic efflux pump;<br>major facilitator superfamily MFS antibiotic efflux pump; resistance-nodulation-cell division RND antibiotic efflux pump                                                                    |
| tet40                        | tetracycline antibiotic                                                                                                                                       | antibiotic efflux                                                                         | major facilitator superfamily MFS antibiotic efflux pump                                                                                                                                                                                        |
| gadW                         | macrolide antibiotic;<br>fluoroquinolone antibiotic;<br>penam                                                                                                 | antibiotic efflux                                                                         | resistance-nodulation-cell division RND antibiotic efflux pump                                                                                                                                                                                  |
| emrD                         |                                                                                                                                                               | antibiotic efflux                                                                         | major facilitator superfamily MFS antibiotic efflux pump                                                                                                                                                                                        |
| escheric<br>hia coli<br>ampC | cephalosporin; penam                                                                                                                                          | antibiotic inactivation                                                                   | ampC-type beta-lactamase                                                                                                                                                                                                                        |
| aadA5                        | aminoglycoside antibiotic                                                                                                                                     | antibiotic inactivation                                                                   | ant3                                                                                                                                                                                                                                            |
| cpxA                         | aminoglycoside antibiotic;<br>aminocoumarin antibiotic<br>fluoroquinolone antibiotic;<br>monobactam; carbapenem;                                              | antibiotic efflux                                                                         | resistance-nodulation-cell division RND antibiotic efflux pump                                                                                                                                                                                  |
| escheric<br>hia coli<br>soxS | cephalosporin; glycylcycline;<br>cephamycin; penam;<br>tetracycline antibiotic;<br>rifamycin antibiotic; phenicol<br>antibiotic; triclosan; penem             | antibiotic target alteration;<br>antibiotic efflux; reduced<br>permeability to antibiotic | ATP-binding cassette ABC antibiotic efflux pump;<br>major facilitator superfamily MFS antibiotic efflux pump; resistance-nodulation-cell division RND antibiotic efflux pump; General Bacterial Porin with reduced permeability to beta-lactams |
| tetO                         | tetracycline antibiotic                                                                                                                                       | antibiotic target protection                                                              | tetracycline-resistant ribosomal protection protein                                                                                                                                                                                             |
| aph6-Id                      | aminoglycoside antibiotic                                                                                                                                     | antibiotic inactivation                                                                   | aph6                                                                                                                                                                                                                                            |
| acrB                         | fluoroquinolone antibiotic;<br>cephalosporin; glycylcycline;<br>penam; tetracycline<br>antibiotic; rifamycin<br>antibiotic; phenicol<br>antibiotic; triclosan | antibiotic efflux                                                                         | resistance-nodulation-cell division RND antibiotic efflux pump                                                                                                                                                                                  |

|                                           |                                                                    |                               |                                                                                       |
|-------------------------------------------|--------------------------------------------------------------------|-------------------------------|---------------------------------------------------------------------------------------|
| mdtA                                      | aminocoumarin antibiotic                                           | antibiotic efflux             | resistance-nodulation-cell division RND antibiotic efflux pump                        |
| escheric<br>hia coli<br>CyaA              | fosfomycin                                                         | antibiotic target alteration  | cya adenylate cyclase                                                                 |
| mdtN                                      | nucleoside antibiotic;<br>acridine dye                             | antibiotic efflux             | major facilitator superfamily MFS antibiotic efflux pump                              |
| acrD                                      | aminoglycoside antibiotic                                          | antibiotic efflux             | resistance-nodulation-cell division RND antibiotic efflux pump                        |
| cat                                       | phenicol antibiotic                                                | antibiotic inactivation       | chloramphenicol acetyltransferase CAT                                                 |
| sul1                                      | sulfonamide antibiotic;<br>sulfone antibiotic                      | antibiotic target replacement | sulfonamide resistant sul                                                             |
| mdtE                                      | macrolide antibiotic;<br>fluoroquinolone antibiotic;<br>penam      | antibiotic efflux             | resistance-nodulation-cell division RND antibiotic efflux pump                        |
| acrF                                      | fluoroquinolone antibiotic;<br>cephalosporin; cephamycin;<br>penam | antibiotic efflux             | resistance-nodulation-cell division RND antibiotic efflux pump                        |
| lnuC                                      | lincosamide antibiotic                                             | antibiotic inactivation       | lincosamide nucleotidyltransferase LNU                                                |
| aac3-IIa                                  | aminoglycoside antibiotic                                          | antibiotic inactivation       | aac3                                                                                  |
| pmrC                                      | peptide antibiotic                                                 | antibiotic target alteration  | pmr phosphoethanolamine transferase                                                   |
| acrE                                      | fluoroquinolone antibiotic;<br>cephalosporin; cephamycin;<br>penam | antibiotic efflux             | resistance-nodulation-cell division RND antibiotic efflux pump                        |
| gadX                                      | macrolide antibiotic;<br>fluoroquinolone antibiotic;<br>penam      | antibiotic efflux             | resistance-nodulation-cell division RND antibiotic efflux pump                        |
| bacA                                      | peptide antibiotic                                                 | antibiotic target alteration  | undecaprenyl pyrophosphate related proteins                                           |
| dfrA17                                    | diaminopyrimidine antibiotic                                       | antibiotic target replacement | trimethoprim resistant dihydrofolate reductase dfr                                    |
| aph3-III<br>a                             | aminoglycoside antibiotic                                          | antibiotic inactivation       | aph3                                                                                  |
| haemop<br>hilus<br>influenz<br>ae<br>PBP3 | monobactam; carbapenem;<br>cephalosporin; cephamycin;<br>penam     | antibiotic target alteration  | Penicillin-binding protein mutations conferring resistance to beta-lactam antibiotics |

|                          |                                                                                                                                                                           |                                                    |                                                                                                                                                                              |
|--------------------------|---------------------------------------------------------------------------------------------------------------------------------------------------------------------------|----------------------------------------------------|------------------------------------------------------------------------------------------------------------------------------------------------------------------------------|
| patA                     | fluoroquinolone antibiotic                                                                                                                                                | antibiotic efflux                                  | ATP-binding cassette ABC antibiotic efflux pump                                                                                                                              |
| mdtF                     | macrolide antibiotic;<br>fluoroquinolone antibiotic;<br>penam                                                                                                             | antibiotic efflux                                  | resistance-nodulation-cell division RND antibiotic efflux pump                                                                                                               |
| emrR                     | fluoroquinolone antibiotic                                                                                                                                                | antibiotic efflux                                  | major facilitator superfamily MFS antibiotic efflux pump                                                                                                                     |
| acrS                     | fluoroquinolone antibiotic;<br>cephalosporin; glycylcycline;<br>cephamycin; penam;<br>tetracycline antibiotic;<br>rifamycin antibiotic; phenicol<br>antibiotic; triclosan | antibiotic efflux                                  | resistance-nodulation-cell division RND antibiotic efflux pump                                                                                                               |
| escherichia coli<br>acrA | fluoroquinolone antibiotic;<br>cephalosporin; glycylcycline;<br>penam; tetracycline<br>antibiotic; rifamycin<br>antibiotic; phenicol<br>antibiotic; triclosan             | antibiotic efflux                                  | resistance-nodulation-cell division RND antibiotic efflux pump                                                                                                               |
| mdtM                     | fluoroquinolone antibiotic;<br>lincosamide antibiotic;<br>nucleoside antibiotic;<br>acridine dye; phenicol<br>antibiotic                                                  | antibiotic efflux                                  | major facilitator superfamily MFS antibiotic efflux pump                                                                                                                     |
| escherichia coli<br>acrR | fluoroquinolone antibiotic;<br>cephalosporin; glycylcycline;<br>penam; tetracycline<br>antibiotic; rifamycin<br>antibiotic; phenicol<br>antibiotic; triclosan             | antibiotic target alteration;<br>antibiotic efflux | resistance-nodulation-cell division RND antibiotic efflux pump                                                                                                               |
| dfrA14                   | diaminopyrimidine antibiotic                                                                                                                                              | antibiotic target replacement                      | trimethoprim resistant dihydrofolate reductase dfr                                                                                                                           |
| mphA                     | macrolide antibiotic                                                                                                                                                      | antibiotic inactivation                            | macrolide phosphotransferase MPH                                                                                                                                             |
| imp-18                   | carbapenem; cephalosporin;<br>cephamycin; penam; penem<br>macrolide antibiotic;<br>fluoroquinolone antibiotic;                                                            | antibiotic inactivation                            | imp beta-lactamase                                                                                                                                                           |
| tolC                     | cephalosporin; glycylcycline;<br>cephamycin; penam;<br>tetracycline antibiotic;<br>aminocoumarin antibiotic;<br>rifamycin antibiotic; phenicol<br>antibiotic; triclosan   | antibiotic efflux                                  | ATP-binding cassette ABC antibiotic efflux pump;<br>major facilitator superfamily MFS antibiotic efflux pump; resistance-nodulation-cell division RND antibiotic efflux pump |
| norB                     | fluoroquinolone antibiotic                                                                                                                                                | antibiotic efflux                                  | major facilitator superfamily MFS antibiotic efflux                                                                                                                          |

|          |                                |                               |                                                                |
|----------|--------------------------------|-------------------------------|----------------------------------------------------------------|
|          |                                |                               | pump                                                           |
| escheric |                                |                               |                                                                |
| hia coli | fosfomycin                     | antibiotic target alteration  | uhpT                                                           |
| UhpT     |                                |                               |                                                                |
| tetBP    | tetracycline antibiotic        | antibiotic target protection  | tetracycline-resistant ribosomal protection protein            |
| mrx      | macrolide antibiotic           | antibiotic inactivation       | macrolide phosphotransferase MPH                               |
| emrA     | fluoroquinolone antibiotic     | antibiotic efflux             | major facilitator superfamily MFS antibiotic efflux pump       |
| emrB     | fluoroquinolone antibiotic     | antibiotic efflux             | major facilitator superfamily MFS antibiotic efflux pump       |
| kdpE     | aminoglycoside antibiotic      | antibiotic efflux             | kdpDE                                                          |
| aph3-II  | aminoglycoside antibiotic      | antibiotic inactivation       | aph3                                                           |
| c        | macrolide antibiotic;          |                               | major facilitator superfamily MFS antibiotic efflux            |
| evgA     | fluoroquinolone antibiotic;    | antibiotic efflux             | pump; resistance-nodulation-cell division RND                  |
|          | penam; tetracycline antibiotic |                               | antibiotic efflux pump                                         |
| emrK     | tetracycline antibiotic        | antibiotic efflux             | major facilitator superfamily MFS antibiotic efflux pump       |
| mdtG     | fosfomycin                     | antibiotic efflux             | major facilitator superfamily MFS antibiotic efflux pump       |
| tet41    | tetracycline antibiotic        | antibiotic efflux             | major facilitator superfamily MFS antibiotic efflux pump       |
| oxa-347  | cephalosporin; penam           | antibiotic inactivation       | oxa beta-lactamase                                             |
| qacH     | fluoroquinolone antibiotic     | antibiotic efflux             | small multidrug resistance SMR antibiotic efflux pump          |
| pmrF     | peptide antibiotic             | antibiotic target alteration  | pmr phosphoethanolamine transferase                            |
| baeR     | aminoglycoside antibiotic;     | antibiotic efflux             | resistance-nodulation-cell division RND antibiotic             |
|          | aminocoumarin antibiotic       |                               | efflux pump                                                    |
| vgaC     | streptogramin antibiotic;      | antibiotic efflux             | ATP-binding cassette ABC antibiotic efflux pump                |
|          | pleuromutilin antibiotic       |                               |                                                                |
| mel      | macrolide antibiotic;          | antibiotic efflux             | ATP-binding cassette ABC antibiotic efflux pump                |
|          | streptogramin antibiotic       |                               |                                                                |
| arnA     | peptide antibiotic             | antibiotic target alteration  | pmr phosphoethanolamine transferase                            |
| mdtC     | aminocoumarin antibiotic       | antibiotic efflux             | resistance-nodulation-cell division RND antibiotic efflux pump |
| dfrA12   | diaminopyrimidine antibiotic   | antibiotic target replacement | trimethoprim resistant dihydrofolate reductase dfr             |

|          |                                |                               |                                                                                                   |
|----------|--------------------------------|-------------------------------|---------------------------------------------------------------------------------------------------|
| escheric |                                |                               |                                                                                                   |
| hia coli | fosfomycin                     | antibiotic target alteration  | glpT                                                                                              |
| GlpT     |                                |                               |                                                                                                   |
| escheric | tetracycline antibiotic;       |                               |                                                                                                   |
| hia coli | benzalkonium chloride;         | antibiotic efflux             | major facilitator superfamily MFS antibiotic efflux pump                                          |
| mdfA     | rhodamine                      |                               |                                                                                                   |
|          | macrolide antibiotic;          |                               | major facilitator superfamily MFS antibiotic efflux pump; resistance-nodulation-cell division RND |
| evgS     | fluoroquinolone antibiotic;    | antibiotic efflux             | antibiotic efflux pump                                                                            |
|          | penam; tetracycline antibiotic |                               |                                                                                                   |
| cmy-19   | cephamycin                     | antibiotic inactivation       | cmy beta-lactamase                                                                                |
| emrY     | tetracycline antibiotic        | antibiotic efflux             | major facilitator superfamily MFS antibiotic efflux pump                                          |
|          | macrolide antibiotic;          |                               | major facilitator superfamily MFS antibiotic efflux pump; resistance-nodulation-cell division RND |
| h-NS     | fluoroquinolone antibiotic;    | antibiotic efflux             | antibiotic efflux pump                                                                            |
|          | cephalosporin; cephamycin;     |                               |                                                                                                   |
|          | penam; tetracycline antibiotic |                               |                                                                                                   |
| yojI     | peptide antibiotic             | antibiotic efflux             | ATP-binding cassette ABC antibiotic efflux pump                                                   |
| floR     | phenicol antibiotic            | antibiotic efflux             | major facilitator superfamily MFS antibiotic efflux pump                                          |
| baeS     | aminoglycoside antibiotic;     | antibiotic efflux             | resistance-nodulation-cell division RND antibiotic efflux pump                                    |
|          | aminocoumarin antibiotic       |                               |                                                                                                   |
| mdtH     | fluoroquinolone antibiotic     | antibiotic efflux             | major facilitator superfamily MFS antibiotic efflux pump                                          |
| aadA3    | aminoglycoside antibiotic      | antibiotic inactivation       | ant3                                                                                              |
| mdtB     | aminocoumarin antibiotic       | antibiotic efflux             | resistance-nodulation-cell division RND antibiotic efflux pump                                    |
| ant4-IIa | aminoglycoside antibiotic      | antibiotic inactivation       | ant4                                                                                              |
| pedo-1   | carbapenem                     | antibiotic inactivation       | subclass B3 PEDO beta-lactamase                                                                   |
|          | fluoroquinolone antibiotic;    |                               |                                                                                                   |
| escheric | cephalosporin; glycylcycline;  |                               |                                                                                                   |
| hia coli | penam; tetracycline            | antibiotic target alteration; | resistance-nodulation-cell division RND antibiotic                                                |
| marR     | antibiotic; rifamycin          | antibiotic efflux             | efflux pump                                                                                       |
|          | antibiotic; phenicol           |                               |                                                                                                   |
|          | antibiotic; triclosan          |                               |                                                                                                   |
| cmlA6    | phenicol antibiotic            | antibiotic efflux             | major facilitator superfamily MFS antibiotic efflux pump                                          |
| sul3     | sulfonamide antibiotic;        | antibiotic target             | sulfonamide resistant sul                                                                         |
|          | sulfone antibiotic             | replacement                   |                                                                                                   |

|                              |                                          |                              |                                  |
|------------------------------|------------------------------------------|------------------------------|----------------------------------|
| escheric<br>hia coli<br>gyrA | fluoroquinolone antibiotic;<br>nybomycin | antibiotic target alteration | fluoroquinolone resistant gyrA   |
| qnrS1                        | fluoroquinolone antibiotic               | antibiotic target protection | quinolone resistance protein qnr |
| lra-3                        | cephalosporin; penam                     | antibiotic inactivation      | subclass B3 LRA beta-lactamase   |

Supplementary Table S2 Abbreviations of antibiotic types.

| Abbreviations     | Full name                                                                                                                              |
|-------------------|----------------------------------------------------------------------------------------------------------------------------------------|
| aminoglycoside    | aminoglycoside                                                                                                                         |
| MLS               | macrolide;lincosamide;streptogramin                                                                                                    |
| tetracycline      | tetracycline                                                                                                                           |
| SS                | sulfonamide;sulfone                                                                                                                    |
| FCGPTRPT          | fluoroquinolone;cephalosporin;glycylcycline;penam;tetracycline;rifamycin;p<br>henicol;triclosan                                        |
| peptide           | peptide                                                                                                                                |
| fluoroquinolone   | fluoroquinolone                                                                                                                        |
| MFP               | macrolide;fluoroquinolone;penam                                                                                                        |
| cephamycin        | cephamycin                                                                                                                             |
| NA                | nucleoside;acridine_dye                                                                                                                |
| fosfomycin        | fosfomycin                                                                                                                             |
| FT                | fluoroquinolone;tetracycline                                                                                                           |
| CP                | cephalosporin;penam                                                                                                                    |
| AA                | aminoglycoside;aminocoumarin                                                                                                           |
| aminocoumarin     | aminocoumarin                                                                                                                          |
| FCCP              | fluoroquinolone;cephalosporin;cephamycin;penam                                                                                         |
| macrolide         | macrolide                                                                                                                              |
| MCCP              | monobactam;cephalosporin;penam;penem                                                                                                   |
| diaminopyrimidine | diaminopyrimidine                                                                                                                      |
| FMCCGCPTRPTP      | fluoroquinolone;monobactam;carbapenem;cephalosporin;glycylcycline;ceph<br>amycin;penam;tetracycline;rifamycin;phenicol;triclosan;penem |
