# Supplementary figures and images for: Metagenomics-Based Analysis of the Age-Related Cumulative Effect of Antibiotic Resistance Genes in Gut Microbiota
Source: MDPI journal article supplement (doi:10.3390/antibiotics10081006), 2021-08-20

a

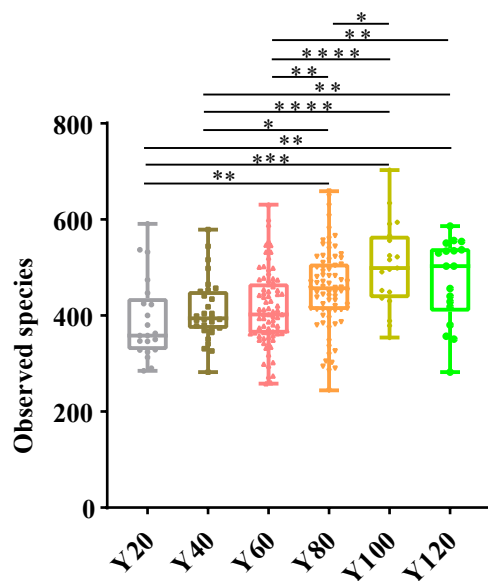

b

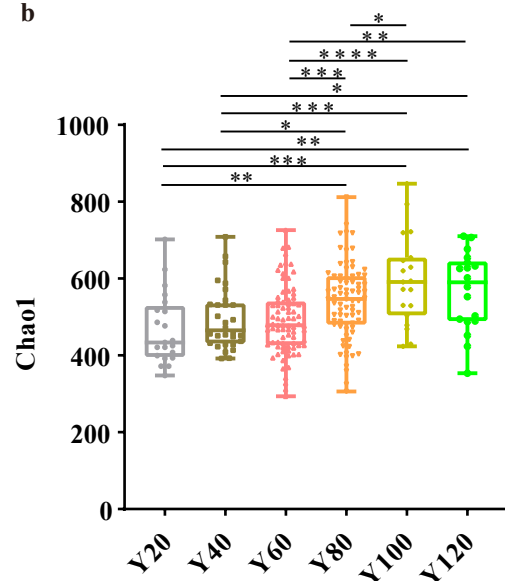

c

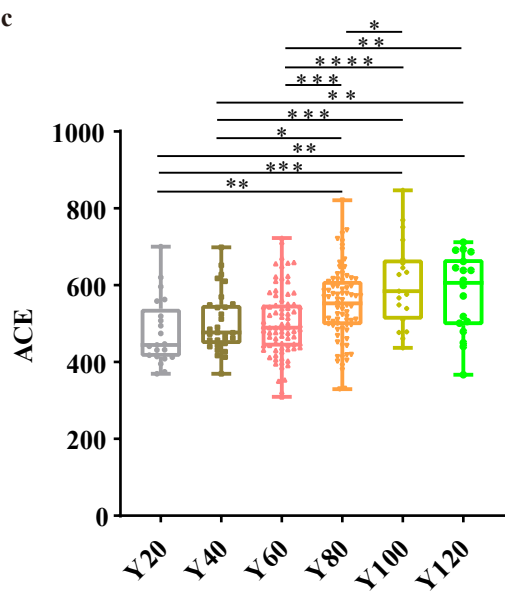

d

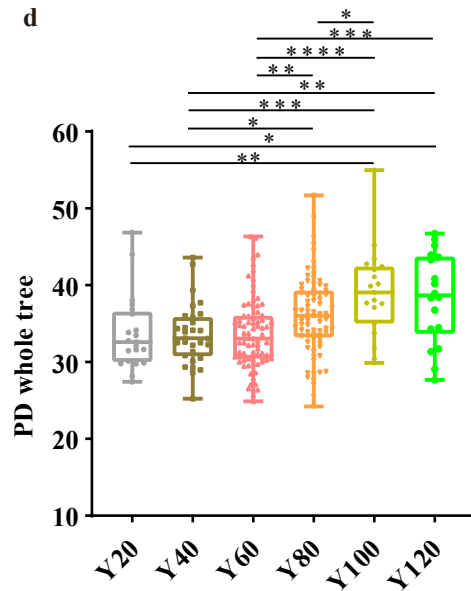

e

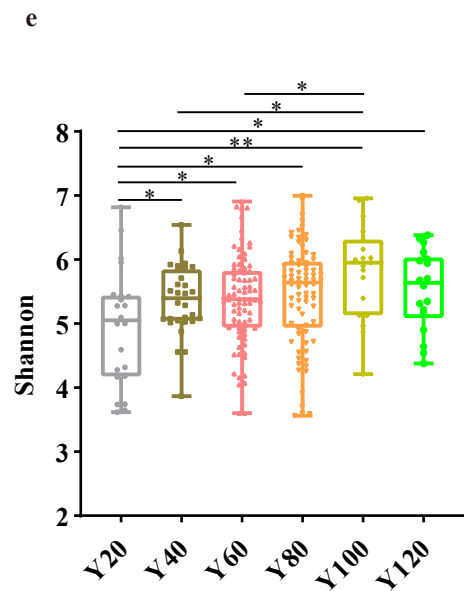

Supplement: s1 [file s1]

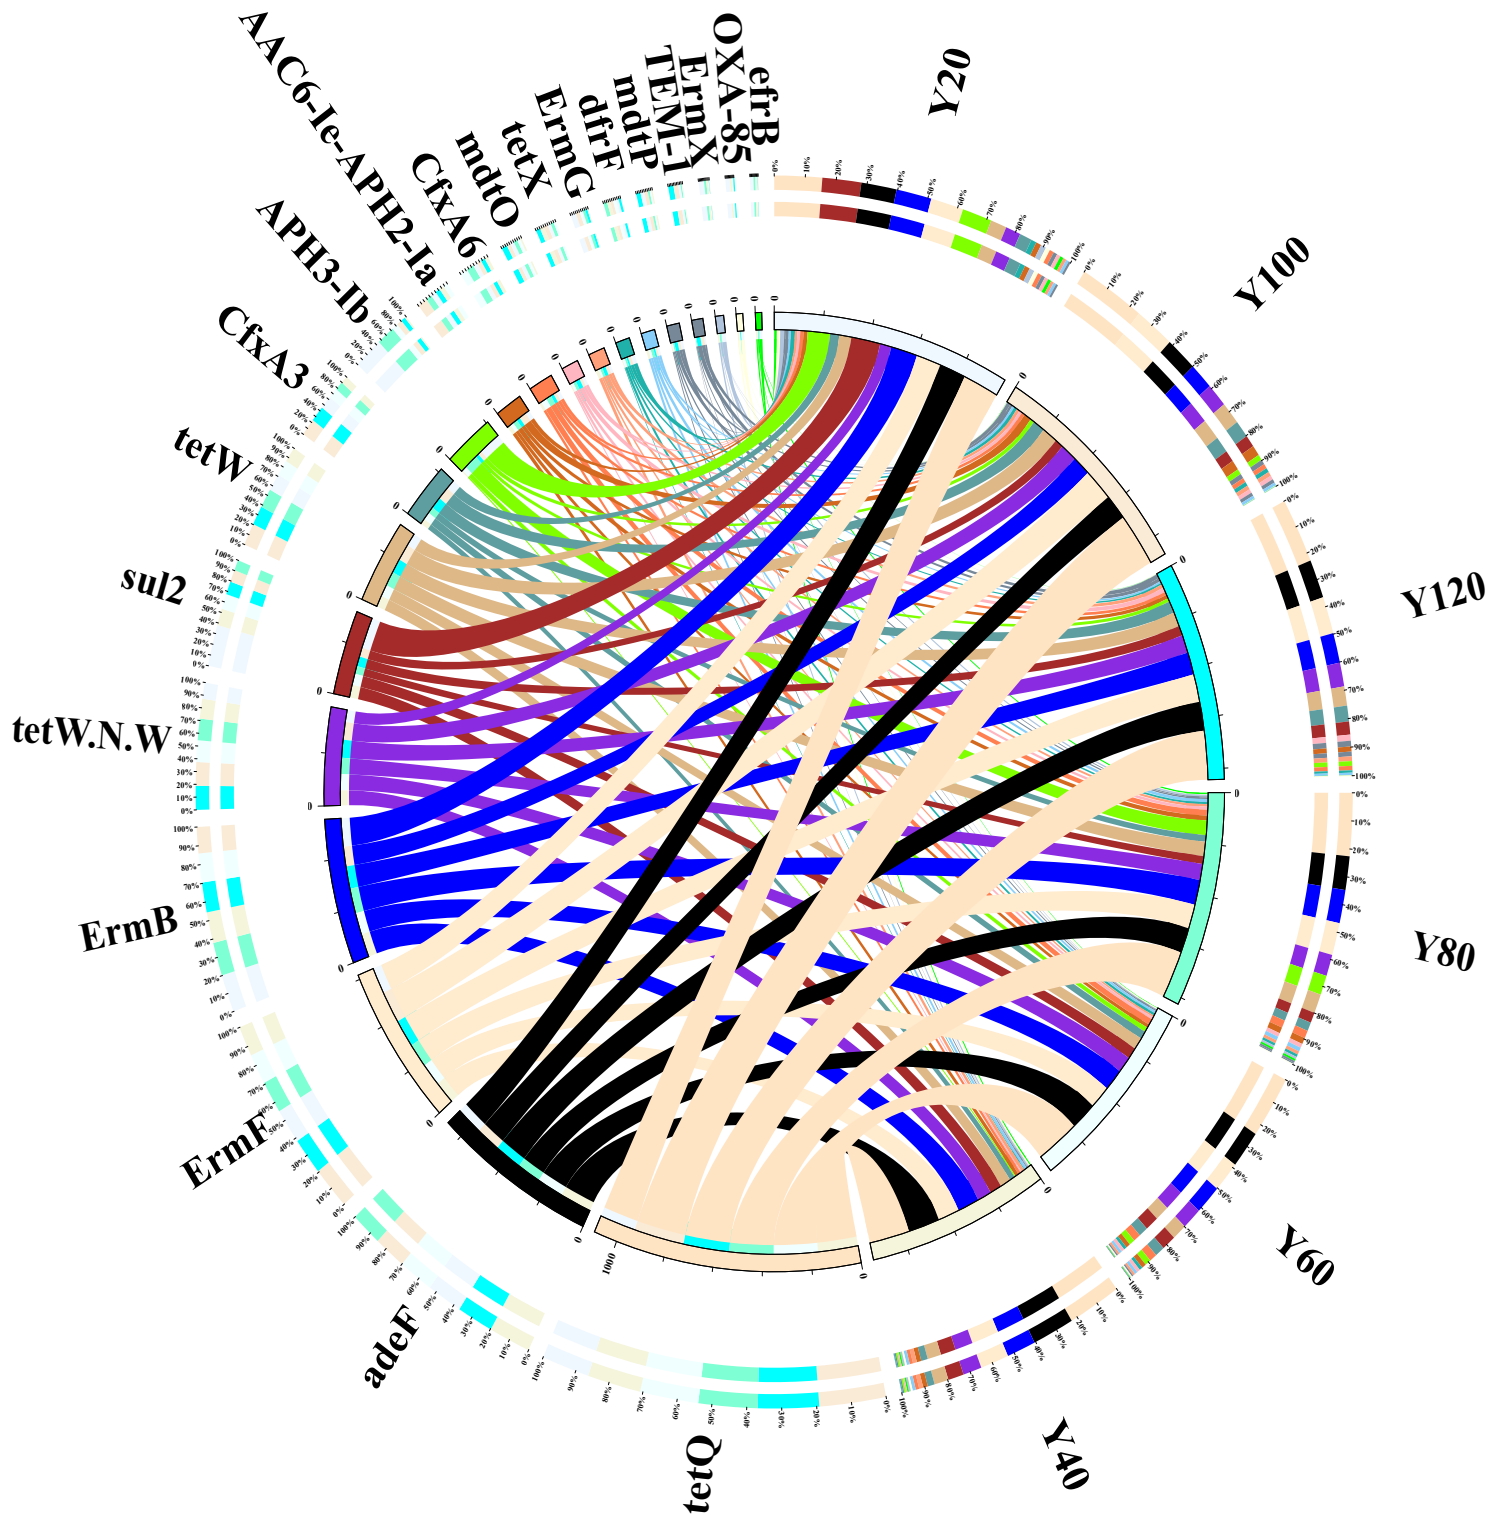

Supplement: s1 [file s1]

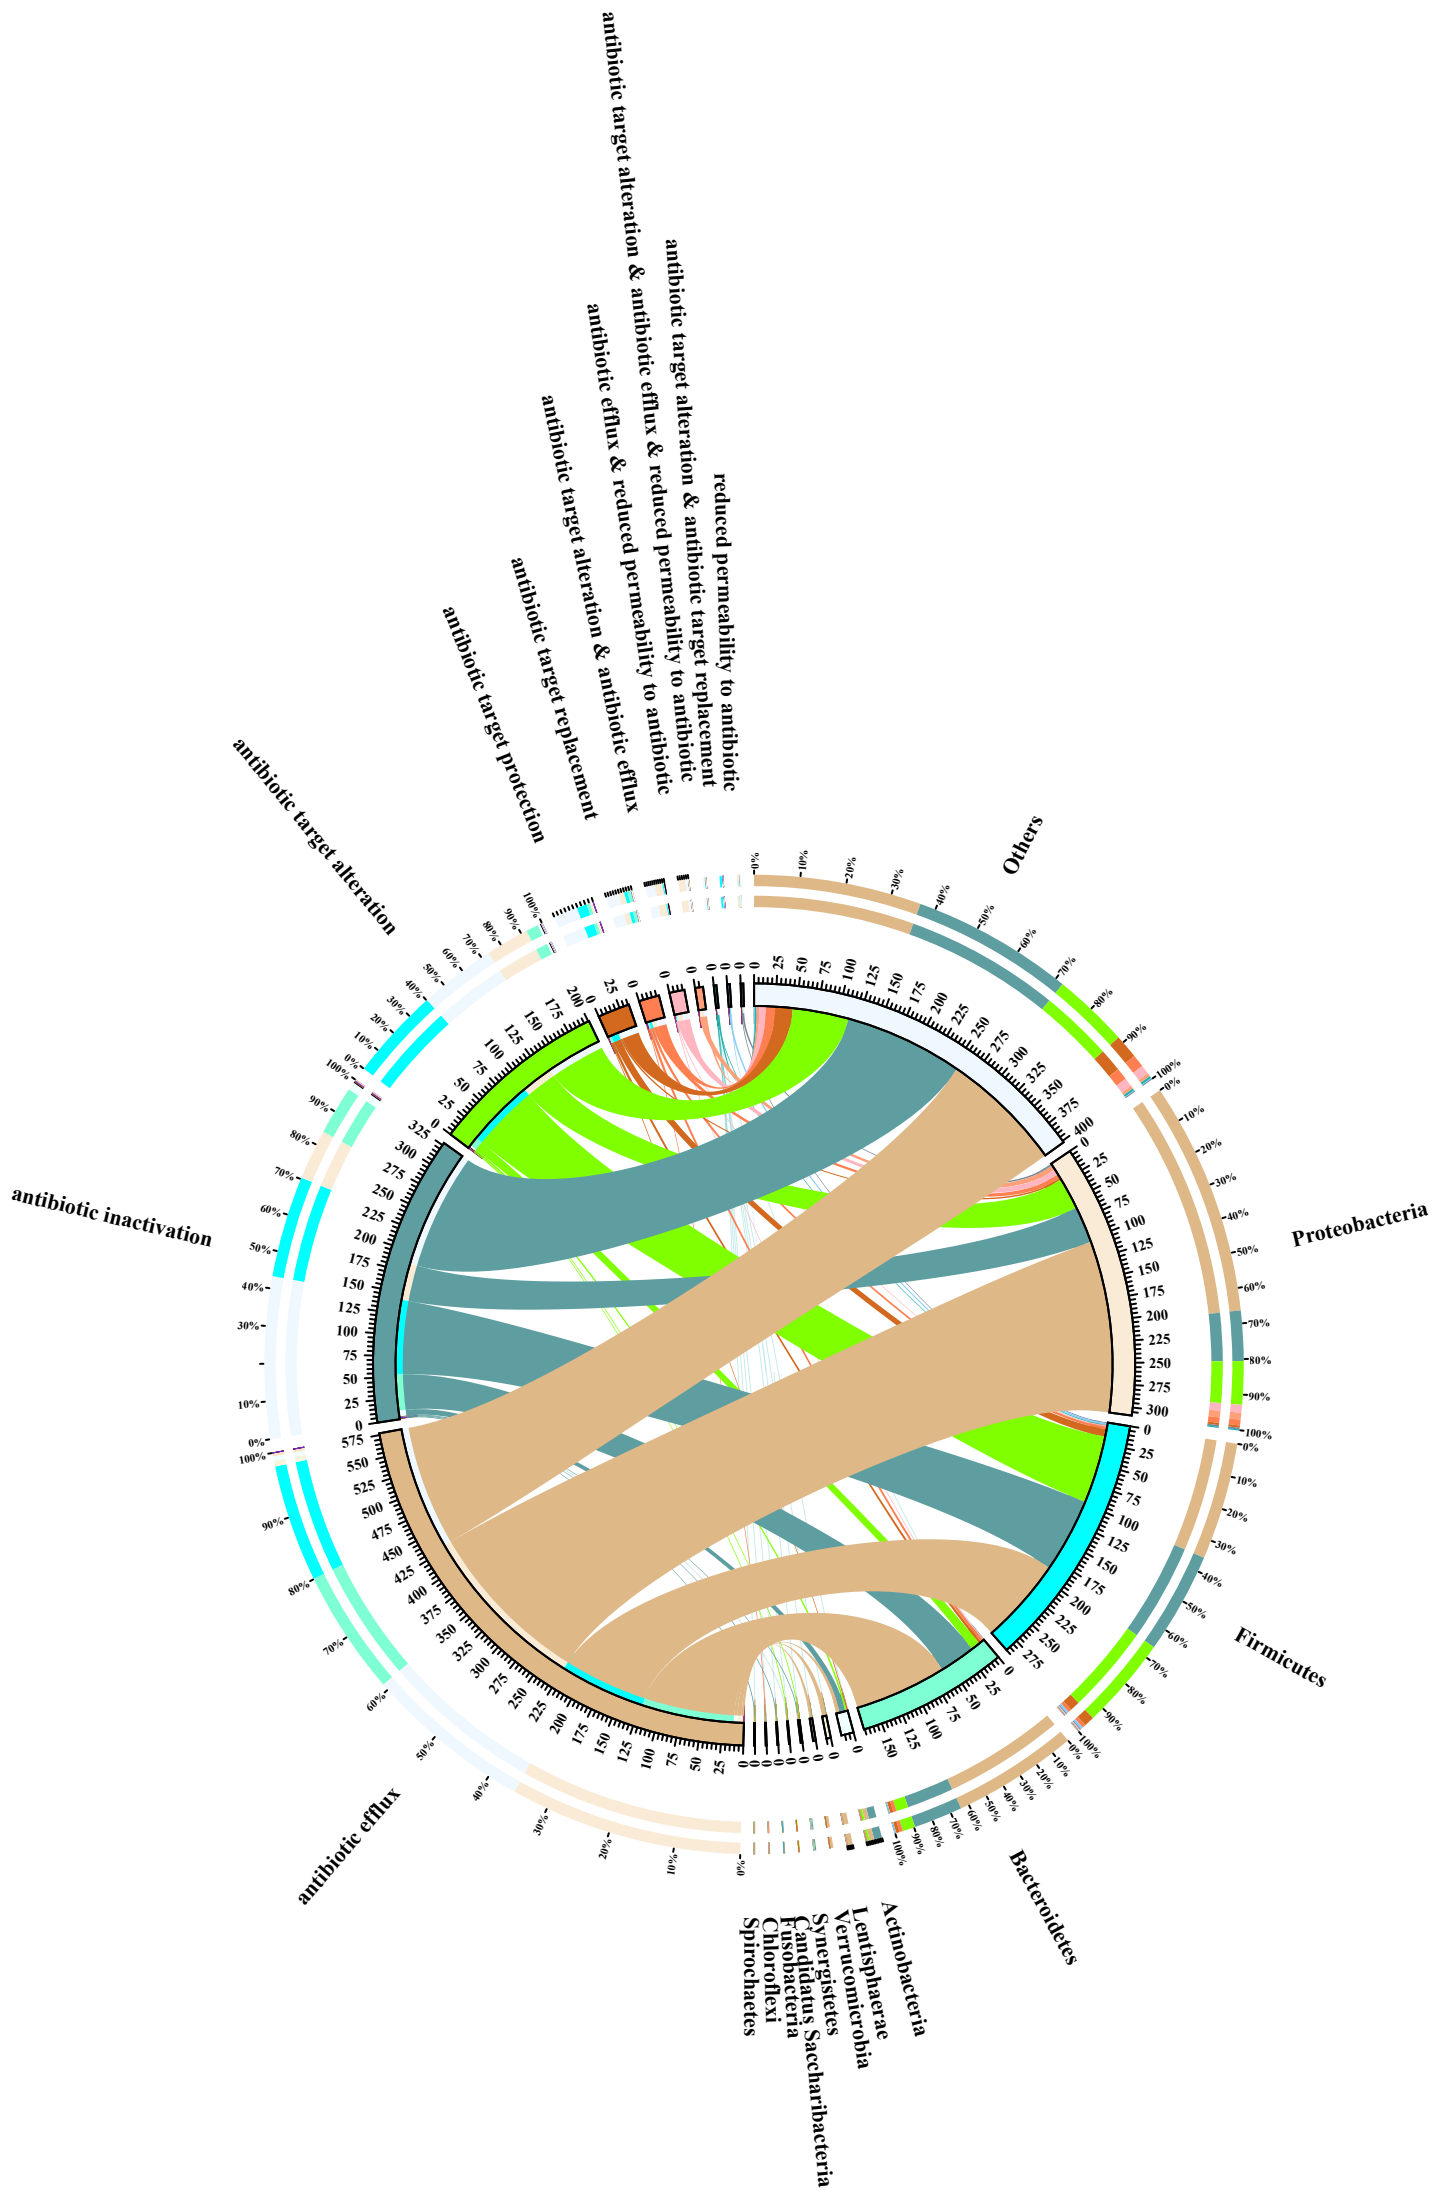

Supplement: s1 [file s1]

**a****Y20**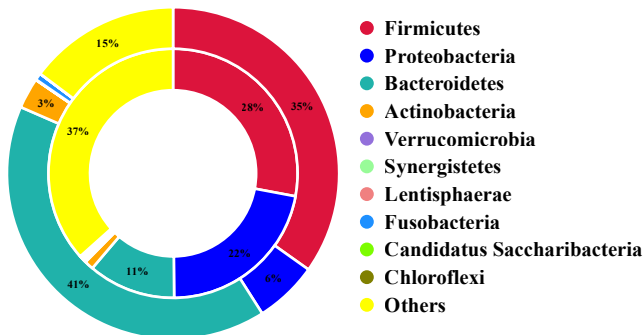**b****Y40**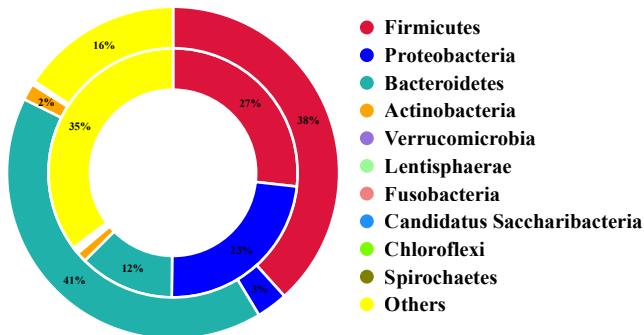**c****Y60**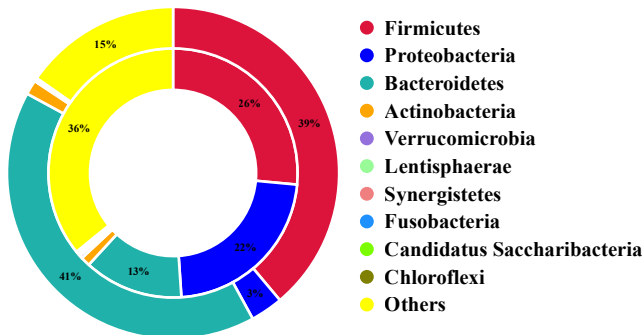**d****Y80**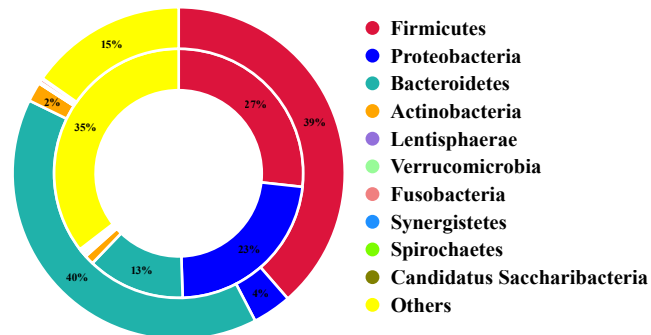**e****Y100**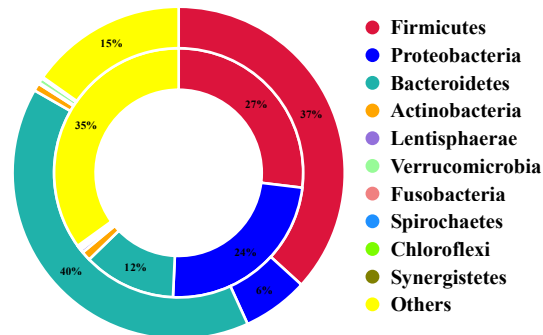**f****Y120**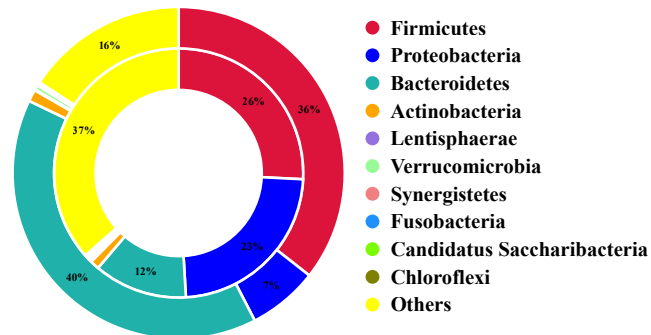

Supplement: s1 [file s1]
